# Supplementary material for: Next generation exome sequencing of paediatric inflammatory bowel disease patients identifies rare and novel variants in candidate genes
Source: HighWire-hosted journal article supplement (doi:10.1136/gutjnl-2011-301833), 2012-04-28
Supplement: gutjnl-2011-301833-s1.pdf [file gutjnl-2011-301833-s1.pdf]

**Supplementary material to:**

**Next generation exome sequencing of paediatric inflammatory bowel disease patients identifies rare and novel variants in candidate genes.**

Katja Christodoulou, Anthony E Wiskin, Jane Gibson, William Tapper, Claire Willis , Nadeem A Afzal, Rosanna Upstill-Goddard, John W Holloway, Michael A Simpson, R Mark Beattie, Andrew Collins & Sarah Ennis

Contents:

Patient vignettes

Supplementary Tables S1-5

## Patient Vignettes

### Proband 1

Crohn's disease diagnosed aged 11 years presenting with a one year history of intermittent abdominal pain, decreased appetite, loose stools (including nocturnal stooling) and poor height and weight gain. Investigation showed ileo-colonic disease with stricturing disease in the proximal ileum. Histology demonstrated chronic inflammation with colonic granulomata and relative preservation of crypt architecture. He received an initial treatment course of exclusive enteral nutrition and was started on azathioprine. A **right hemi-colectomy** was performed within six months of diagnosis for persistent stricturing disease with pre stenotic dilatation. His disease has subsequently been well controlled with azathioprine.

### Proband 2

Crohn's disease **diagnosed aged 7 years** presenting with a 6 month history of intermittent abdominal pain, loose bloody stools and static weight. Initial investigation demonstrated mild patchy pancolitis. Recurrent histology has shown preservation of glandular architecture but moderately active colitis. Her disease was resistant to treatment with exclusive enteral nutrition and several courses of corticosteroids in combination with azathioprine. Induction with Infliximab improved her symptoms but after one year of maintenance therapy her symptoms returned. She has responded to higher dosing.

### Proband 3

Crohn's disease **diagnosed aged 6 years** presenting with a two month history of weight loss, abdominal pain and vomiting. **Positive family history** (maternal Crohn's disease diagnosed age 21). Histology demonstrated granulomatous inflammation in the stomach, ileum and colon. Tuberculosis and immunodeficiency were excluded. He responded well to treatment with exclusive enteral nutrition and has been well to date. He has multiple IgE mediated food allergies.

### Proband 4

Crohn's disease **diagnosed aged 6 years** presenting with an eight month history of diarrhoea and acute cryptosporidium infection. She was severely malnourished at presentation with acute weight loss, abdominal pain and worsening diarrhoea and was dependent on parenteral nutrition for several weeks. Endoscopy and histology demonstrated patchy colitis with preservation of crypt architecture which has been confirmed on repeat endoscopy. Treatment with corticosteroids was successful and she has been well subsequently.

### Proband 5

Crohn's disease diagnosed aged 13 years presenting with a six month history of diarrhoea (including nocturnal stooling) abdominal pain and mouth ulcers plus a **positive family history** of IBD (maternal Crohn's disease and grandmaternal Ulcerative Colitis). Endoscopy and histology showed patchy colonic inflammation with relative preservation of crypt architecture. His disease has been successfully managed with amino-salicylates.

### Proband 6

Ulcerative Colitis (left sided) diagnosed aged 9 years presenting with a two month history of bloody diarrhoea. Histology demonstrated crypt abscesses and cryptitis with diffuse inflammatory cell

infiltrate. He also has **oral pemphigus which presented at age 11 years with severe oral ulceration**. He responded to corticosteroids and longer term aminosaliclylate and azathioprine as maintenance.

Proband 7

Ulcerative Colitis (pancolitis) **diagnosed aged 2 years**. Histology demonstrated widespread crypt distortion with cryptitis and increased inflammatory cells more pronounced distally. He required prolonged treatment with corticosteroids and azathioprine to achieve remission but remains well on azathioprine. He also has primary hypothyroidism although auto-antibody screen is repeatedly negative.

Proband 8

Colitis (left sided) classified as IBDU **diagnosed aged 3 years** presenting with a four month history of bloody diarrhoea. Histology showed active colitis with occasional crypt abscesses and no granulomata. He responded to initial treatment with corticosteroids and has been maintained in remission on amino-salicylates.

**Supplementary Table 1: Summary statistics for exome sequencing - mapping and coverage**

| <b>Sequenced exomes</b>                      | <b>Proband 1</b> | <b>Proband 2</b> | <b>Proband 3</b> | <b>Proband 4</b> | <b>Proband 5</b> | <b>Proband 6</b> | <b>Proband 7</b> | <b>Proband 8</b> |
|----------------------------------------------|------------------|------------------|------------------|------------------|------------------|------------------|------------------|------------------|
| <b>Total no. read seqs</b>                   | 50,583,874       | 54,278,594       | 51,698,058       | 61,686,454       | 46,971,966       | 108,712,050      | 73,873,640       | 72,246,856       |
| <b>Total no. aligned reads</b>               | 49,651,350       | 53,141,656       | 50,904,320       | 60,644,577       | 45,894,857       | 106,505,676      | 72,596,746       | 70,939,697       |
| <b>Total no. unique alignments</b>           | 45,762,617       | 49,013,160       | 47,027,836       | 56,068,870       | 42,335,161       | 98,532,568       | 67,085,167       | 65,387,188       |
| <b>Mapped to target reads +/-150bp (%)</b>   | 72.23            | 72.45            | 73.89            | 73.43            | 66.38            | 67.89            | 70.12            | 69.80            |
| <b>Mapped to target reads (%)</b>            | 65.51            | 65.34            | 67.04            | 66.17            | 59.71            | 61.48            | 63.73            | 63.36            |
| <b>Target bases with coverage &gt;1 (%)</b>  | 98.57            | 97.80            | 97.93            | 98.20            | 98.22            | 98.92            | 98.54            | 98.60            |
| <b>Target bases with coverage &gt;5 (%)</b>  | 92.38            | 91.36            | 91.78            | 92.63            | 91.77            | 94.89            | 93.48            | 93.53            |
| <b>Target bases with coverage &gt;10 (%)</b> | 86.74            | 85.10            | 86.06            | 87.43            | 85.45            | 91.02            | 88.81            | 88.77            |
| <b>Target bases with coverage &gt;20 (%)</b> | 75.81            | 72.00            | 75.43            | 77.94            | 72.73            | 85.12            | 81.04            | 80.76            |
| <b>Mean read depth across exome</b>          | 46.87            | 40.20            | 51.07            | 54.63            | 41.72            | 99.67            | 70.76            | 68.03            |

**Supplementary Table 2: Summary statistics for exome sequencing - number of variants of different classes identified by exome sequencing in eight PIBD cases**

| Variant type         | Proband 1     |               |            | Proband 2     |               |            | Proband 3     |               |            | Proband 4     |               |            | Proband 5     |               |            | Proband 6     |               |            | Proband 7     |               |            | Proband 8     |               |            |
|----------------------|---------------|---------------|------------|---------------|---------------|------------|---------------|---------------|------------|---------------|---------------|------------|---------------|---------------|------------|---------------|---------------|------------|---------------|---------------|------------|---------------|---------------|------------|
|                      | All           | Known         | Novel      |
| Synonymous           | 10,100        | 9,993         | 107        | 10,096        | 9,974         | 122        | 10,231        | 10,145        | 86         | 10,255        | 10,149        | 106        | 10,038        | 9,926         | 112        | 10,588        | 10,477        | 111        | 10,339        | 10,226        | 113        | 10,734        | 10,506        | 228        |
| Heterozygous         | 6,130         | 6,030         | 100        | 6,046         | 5,925         | 121        | 6,223         | 6,139         | 84         | 6,317         | 6,212         | 105        | 6,040         | 5,935         | 105        | 6,362         | 6,256         | 106        | 6,218         | 6,111         | 107        | 6,614         | 6,400         | 214        |
| Homozygous           | 3,970         | 3,963         | 7          | 4,050         | 4,049         | 1          | 4,008         | 4,006         | 2          | 3,938         | 3,937         | 1          | 3,998         | 3,991         | 7          | 4,226         | 4,221         | 5          | 4,121         | 4,115         | 6          | 4,120         | 4,106         | 14         |
| Non-synonymous       | 9,420         | 9,204         | 216        | 9,452         | 9,246         | 206        | 9,589         | 9,405         | 184        | 9,542         | 9,329         | 213        | 9,366         | 9,151         | 215        | 9,678         | 9,457         | 221        | 9,784         | 9,591         | 193        | 10,037        | 9,679         | 358        |
| Heterozygous         | 5,940         | 5,733         | 207        | 5,956         | 5,753         | 203        | 5,937         | 5,757         | 180        | 5,986         | 5,776         | 210        | 5,836         | 5,642         | 194        | 5,843         | 5,629         | 214        | 6,097         | 5,912         | 185        | 6,372         | 6,034         | 338        |
| Homozygous           | 3,480         | 3,471         | 9          | 3,496         | 3,493         | 3          | 3,652         | 3,648         | 4          | 3,556         | 3,553         | 3          | 3,530         | 3,509         | 21         | 3,835         | 3,828         | 7          | 3,687         | 3,679         | 8          | 3,665         | 3,645         | 20         |
| Frameshift indel     | 184           | 172           | 12         | 189           | 176           | 13         | 188           | 175           | 13         | 184           | 179           | 5          | 171           | 162           | 9          | 189           | 178           | 11         | 193           | 182           | 11         | 197           | 191           | 6          |
| Heterozygous         | 56            | 44            | 12         | 74            | 61            | 13         | 59            | 48            | 11         | 50            | 45            | 5          | 56            | 48            | 8          | 51            | 40            | 11         | 62            | 52            | 10         | 62            | 56            | 6          |
| Homozygous           | 128           | 128           | 0          | 115           | 115           | 0          | 129           | 127           | 2          | 134           | 134           | 0          | 115           | 114           | 1          | 138           | 138           | 0          | 131           | 130           | 1          | 135           | 135           | 0          |
| Non-frameshift Indel | 183           | 174           | 9          | 173           | 166           | 7          | 179           | 167           | 12         | 187           | 173           | 14         | 164           | 154           | 10         | 203           | 191           | 12         | 198           | 181           | 17         | 184           | 163           | 21         |
| Heterozygous         | 116           | 108           | 8          | 110           | 103           | 7          | 95            | 85            | 10         | 119           | 106           | 13         | 98            | 90            | 8          | 120           | 112           | 8          | 121           | 104           | 17         | 108           | 90            | 18         |
| Homozygous           | 67            | 66            | 1          | 63            | 63            | 0          | 84            | 82            | 2          | 68            | 67            | 1          | 66            | 64            | 2          | 83            | 79            | 4          | 77            | 77            | 0          | 76            | 73            | 3          |
| Splicing             | 2,518         | 2,471         | 47         | 2,481         | 2,431         | 50         | 2,559         | 2,513         | 46         | 2,623         | 2,571         | 52         | 2,418         | 2,379         | 39         | 2,662         | 2,615         | 47         | 2,615         | 2,573         | 42         | 2,720         | 2,630         | 90         |
| Heterozygous         | 1,494         | 1,449         | 45         | 1,459         | 1,414         | 45         | 1,519         | 1,475         | 44         | 1,596         | 1,546         | 50         | 1,412         | 1,376         | 36         | 1,551         | 1,507         | 44         | 1,549         | 1,509         | 40         | 1,650         | 1,566         | 84         |
| Homozygous           | 1,024         | 1,022         | 2          | 1,022         | 1,017         | 5          | 1,040         | 1,038         | 2          | 1,027         | 1,025         | 2          | 1,006         | 1,003         | 3          | 1,111         | 1,108         | 3          | 1,066         | 1,064         | 2          | 1,070         | 1,064         | 6          |
| StopLoss / gain      | 117           | 110           | 7          | 123           | 114           | 9          | 110           | 104           | 6          | 115           | 110           | 5          | 113           | 103           | 10         | 122           | 112           | 10         | 111           | 103           | 8          | 127           | 117           | 10         |
| Heterozygous         | 85            | 78            | 7          | 92            | 83            | 9          | 79            | 73            | 6          | 82            | 77            | 5          | 79            | 69            | 10         | 87            | 77            | 10         | 84            | 76            | 8          | 92            | 82            | 10         |
| Homozygous           | 32            | 32            | 0          | 31            | 31            | 0          | 31            | 31            | 0          | 33            | 33            | 0          | 34            | 34            | 0          | 35            | 35            | 0          | 27            | 27            | 0          | 35            | 35            | 0          |
| <b>TOTAL</b>         | <b>22,522</b> | <b>22,124</b> | <b>398</b> | <b>22,514</b> | <b>22,107</b> | <b>407</b> | <b>22,856</b> | <b>22,509</b> | <b>347</b> | <b>22,906</b> | <b>22,511</b> | <b>395</b> | <b>22,270</b> | <b>21,875</b> | <b>395</b> | <b>23,442</b> | <b>23,030</b> | <b>412</b> | <b>23,240</b> | <b>22,856</b> | <b>384</b> | <b>23,999</b> | <b>23,286</b> | <b>713</b> |

**Supplementary Table 3: Panel of 169 selected genes associated with IBD**

|          |
|----------|
| AAMP     |
| ADAD1    |
| AMIGO3   |
| APEH     |
| ARPC2    |
| ATG16L1  |
| BACH2    |
| BSN      |
| BTNL2    |
| C11orf30 |
| C1orf106 |
| C1orf93  |
| C2orf74  |
| CAPN10   |
| CARD9    |
| CCL11    |
| CCL2     |
| CCL7     |
| CCNY     |
| CCR6     |
| CD19     |
| CD244    |
| CDKAL1   |
| CPEB4    |
| CREM     |
| CXCR1    |
| CXCR2    |
| DAP      |
| DENND1B  |
| DNMT3A   |
| EIF3C    |
| ERAP2    |
| ERRFI1   |
| ESRRA    |
| EXOC3    |
| FADS1    |
| FASLG    |
| FCGR2A   |
| FCGR2B   |
| FIGNL1   |
| FUT2     |
| GALC     |
| GCKR     |
| GMPPB    |
| GNA12    |
| GPR35    |
| GPR65    |

|          |
|----------|
| GPX1     |
| GPX4     |
| GSDMB    |
| HLA-DQA1 |
| HLA-DQA2 |
| HLA-DRA  |
| HLA-DRB1 |
| HLA-DRB5 |
| HORMAD2  |
| HSPA6    |
| ICAM1    |
| ICAM3    |
| ICOSLG   |
| IFNG     |
| IKZF1    |
| IKZF3    |
| IL10     |
| IL10RA   |
| IL10RB   |
| IL12B    |
| IL17REL  |
| IL18R1   |
| IL18RAP  |
| IL19     |
| IL1R2    |
| IL1RL1   |
| IL1RL2   |
| IL2      |
| IL20     |
| IL21     |
| IL23R    |
| IL26     |
| IL27     |
| IL2RA    |
| IL3      |
| IL7R     |
| INPP5E   |
| IRF1     |
| IRF5     |
| IRGM     |
| ITLN1    |
| JAK2     |
| KIF1A    |
| KIF21B   |
| LACC1    |
| LAT      |
| LIF      |
| LRRK2    |
| LSP1     |

|          |
|----------|
| LST1     |
| LTA      |
| LTB      |
| MLX      |
| MMEL1    |
| MST1     |
| MTMR3    |
| MUC1     |
| MUC19    |
| NDFIP1   |
| NKX2-3   |
| NOD2     |
| ORMDL3   |
| PARK7    |
| PIM3     |
| PLCH2    |
| PLCL1    |
| PNMT     |
| PRDM1    |
| PRDX5    |
| PSMG1    |
| PTGER4   |
| PTPN2    |
| PTPN22   |
| PUS10    |
| RASIP1   |
| REL      |
| RNPEPL1  |
| RTEL1    |
| SBNO2    |
| SCAMP3   |
| SDCCAG3  |
| SEC16A   |
| SERINC3  |
| SH2B1    |
| SLC11A1  |
| SLC22A4  |
| SLC22A5  |
| SLC2A4RG |
| SMAD3    |
| SNAPC4   |
| SP140    |
| STAT3    |
| STMN3    |
| SULT1A1  |
| SULT1A2  |
| TAB1     |
| TAGAP    |
| THADA    |



|          |
|----------|
| TNF      |
| TNFRSF14 |
| TNFRSF6B |
| TNFRSF9  |
| TNFSF11  |
| TNFSF15  |
| TNFSF18  |
| TNFSF4   |
| TNFSF8   |
| TNPO3    |
| TYK2     |
| UBA7     |
| UBE2D1   |
| UTS2     |
| VAMP3    |
| YDJC     |
| ZBTB46   |
| ZFP36L1  |
| ZFP90    |
| ZGPAT    |
| ZMIZ1    |
| ZNF365   |
| ZPBP     |
| ZPBP2    |

















|        |    |     |    |                                |            |            |       |       |       |       |      |     |    |   |   |   |   |   |   |   |   |   |   |   |   |
|--------|----|-----|----|--------------------------------|------------|------------|-------|-------|-------|-------|------|-----|----|---|---|---|---|---|---|---|---|---|---|---|---|
| ZNF365 | 10 | 4   | ns | Zinc finger                    | 64,085,190 | rs7076156  | A184G | T62A  | 0.865 | 0.732 | 0.80 | 58  | MC | U | 8 | 5 | 3 | . | . | . | . | . | . | . | . |
| ZPBP   | 7  | N/A | sp | Zona pellucida binding protein | 49,993,668 | rs988392   | C>T   | -     | 0.829 | 0.797 | -    | -   | -  | - | 7 | 6 | 1 | . | . | . | . | . | . | . | . |
| ZPBP2  | 17 | 5   | ns | Zona pellucida binding protein | 35,282,160 | rs11557467 | G518T | S173I | 0.399 | 0.488 | 0.12 | 142 | MR | B | 8 | 3 | 5 | . | . | . | . | . | . | . | . |

Novel variants are shown in grey.

N/A = not applicable, NR = not reported, NR‡ indicates variants that despite not being reported in dbSNP132 or 1000 genomes, are reported in dbSNP129 or seen in our in-house control exomes and are therefore not characterised as novel.

\* Indicates the first bp location of a 3-bp deletion.

Where a specific variant is present in a proband, this is indicated by a dot (.)

Where a specific variant is present in a proband and has a SIFT score of < 0.05, this is indicated by ◊

‡indicates a dinucleotide variant (that for IL18RAP results in a codon change from CTG > AAG, resulting in p.L428K amino acid change).

ns=nonsynonymous; sg=stopgain; sp=splicing; fi=frameshift insertion; nd=nonframeshift deletion.

C=conservative; MC=moderately conservative; MR=moderately radical; R=radical.

B=benign; PoD=possibly damaging; PrD=probably damaging; U=unknown

HLA gene variants should be considered with caution due to known challenges of accurate alignment of short read data and consequent difficulty in robust identification of variants from highly divergent HLA haplotypes.

### Supplementary Table 5: Chi-squared contingency testing for excess of rare variants in IBD candidate genes in cases compared to controls

|               | Synonymous | Non-synonymous and non-frameshift |
|---------------|------------|-----------------------------------|
| Cases n=8     | 61         | 77                                |
| Controls n=22 | 149        | 208                               |

Pearson  $\chi^2$  (1 degree freedom) = 0.25, p = 0.62
